# Supplementary material for: Oncogenic KRAS mutations enhance amino acid uptake by colorectal cancer cells via the hippo signaling effector YAP1
Source: PubMed Central journal article supplement (PMC8486573; doi:10.1002/1878-0261.12999), 2021-06-18
Supplement: MOL2-15-2782-s006.pdf [file MOL2-15-2782-s006.pdf]

**Figure 1D.** Western blot quantification

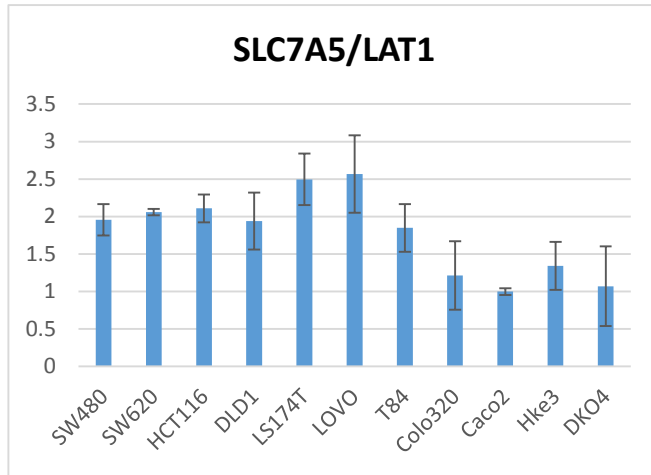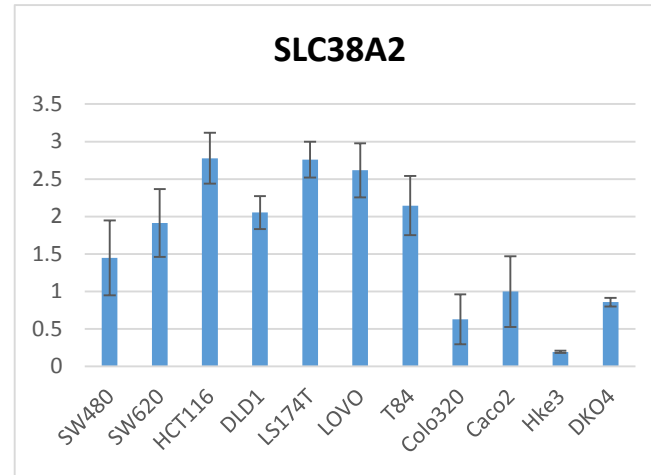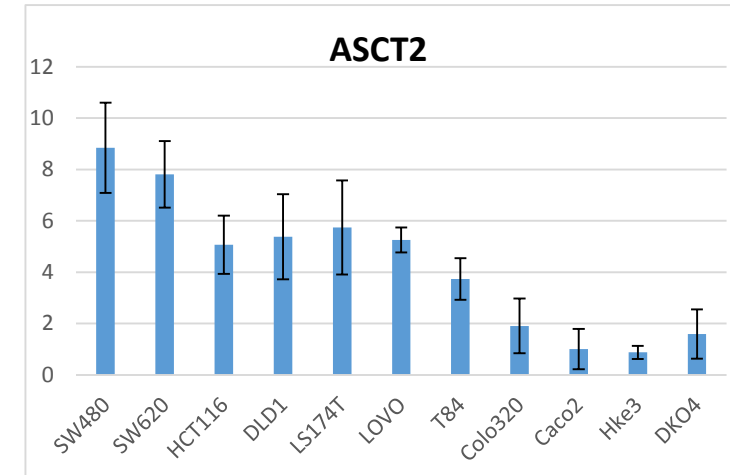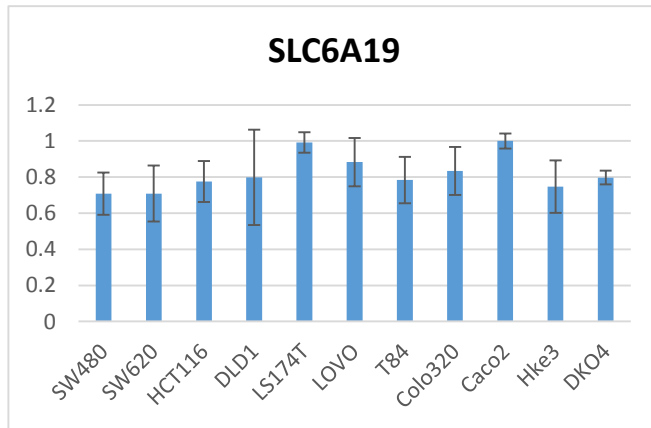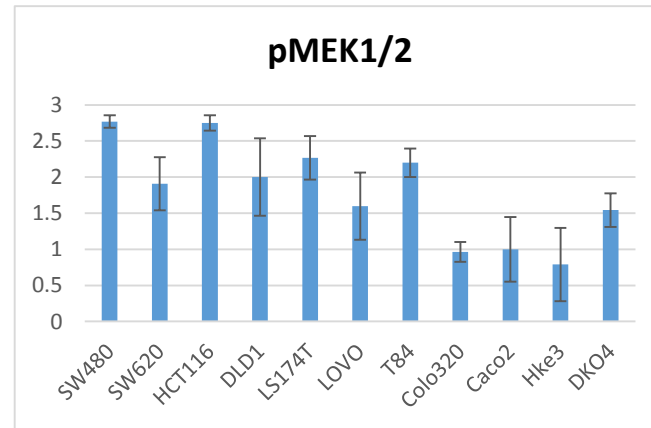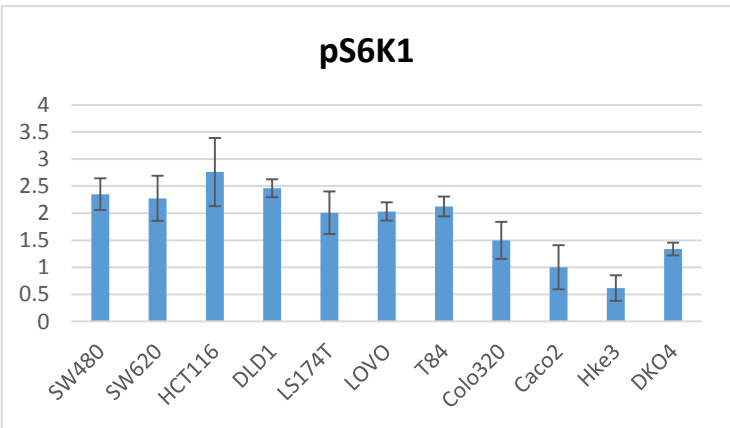

Densitometry for the Figure 1D. Bar graph shows the relative protein expression levels of the targets in different CRC cell lines.

**Figure 2A.** Western blot quantification

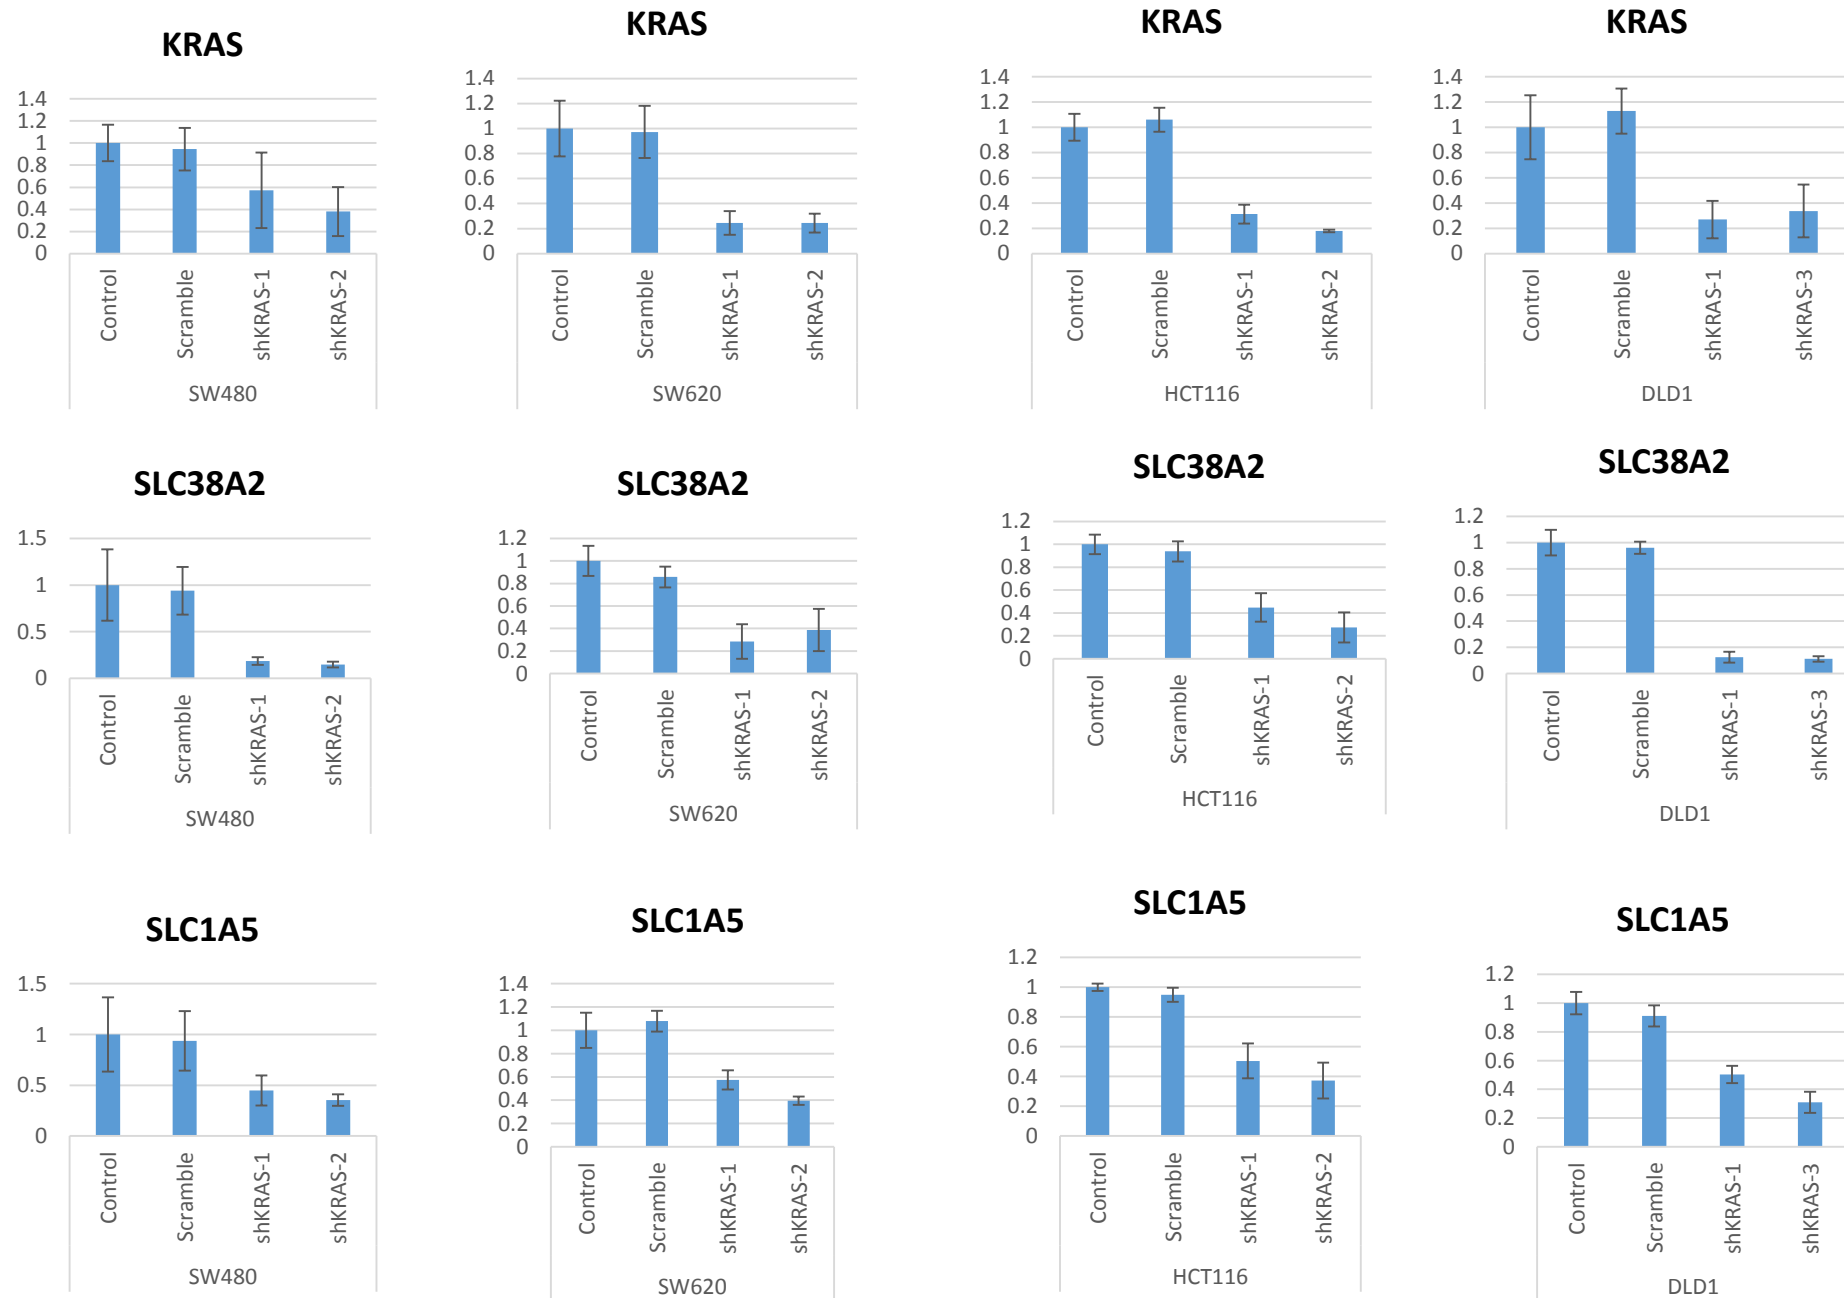

Densitometry for the Figure 2A. Bar graph shows the relative protein expression levels of the targets (KRAS, SLC38A2 and SLC1A5) in shKRAS transfected cells.

**Figure 2A. Western blot quantification**

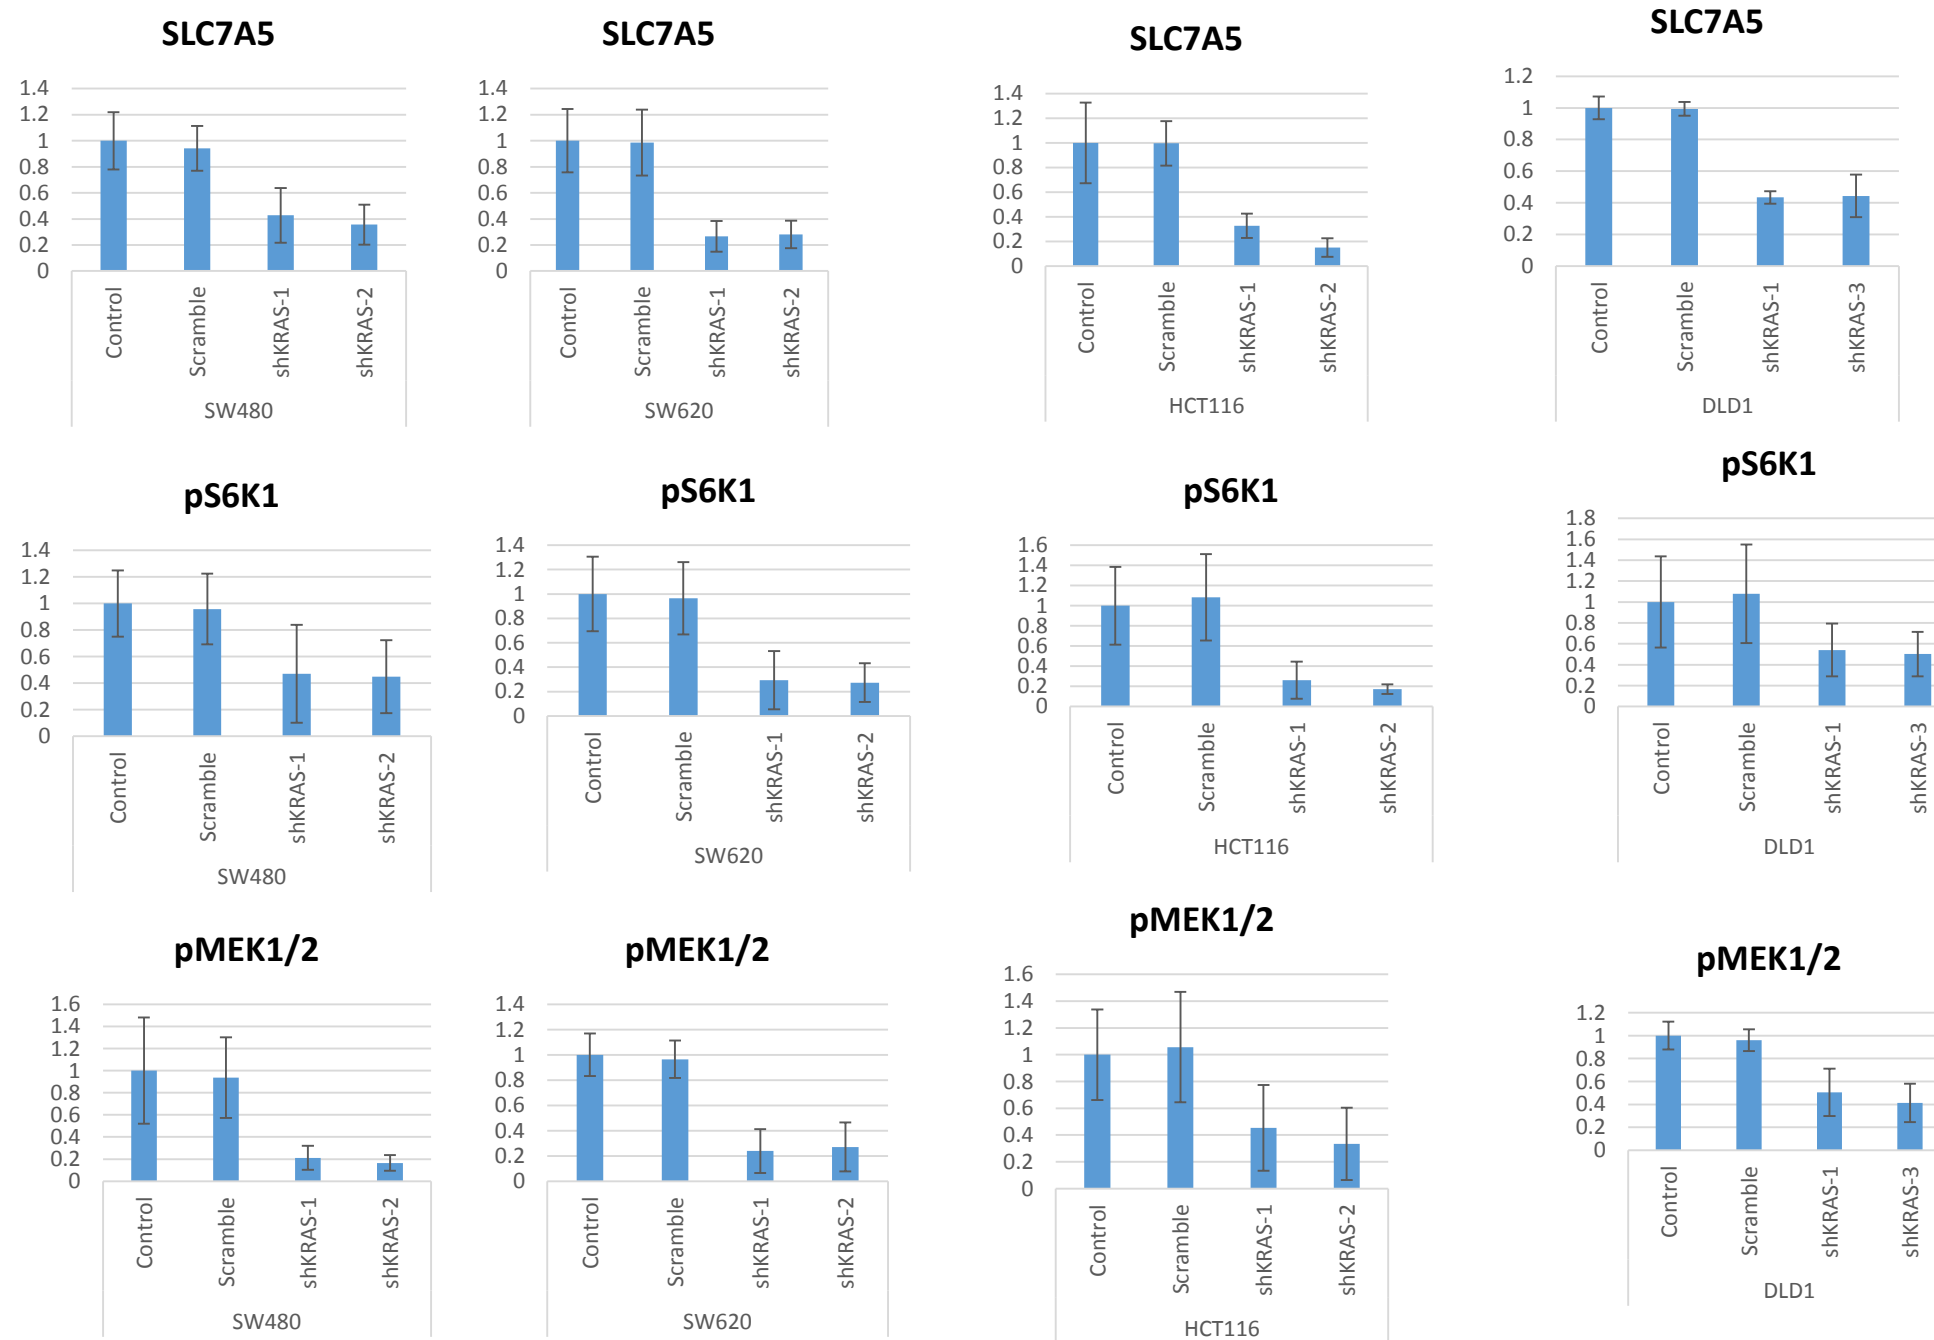

Densitometry for the Figure 2A. Bar graph shows the relative protein expression levels of the targets (SLC7A5, pS6K1 and pMEK1/2) in shKRAS transfected cells.

**Figure 2A.** Western blot quantification

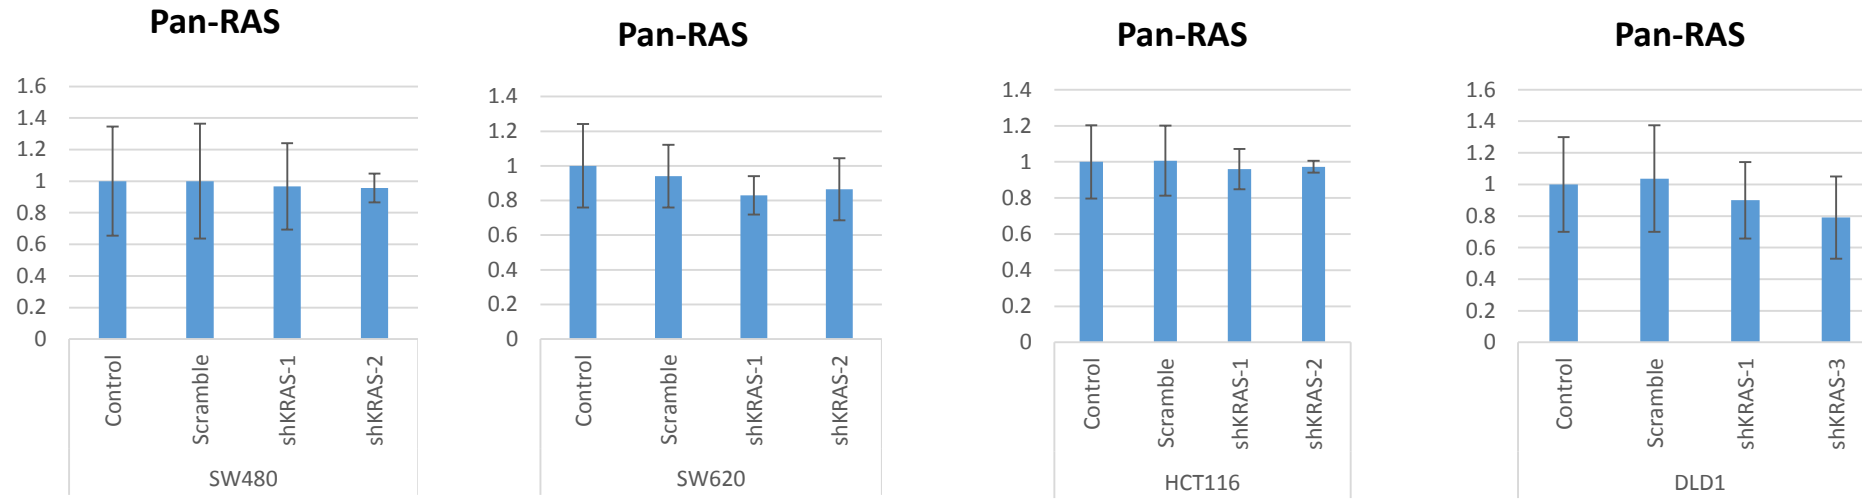

Densitometry for the Figure 2A. Bar graph shows the relative protein expression levels of the targets (pan-Ras) in shKRAS transfected cells.

**Fig. 3A.** Western blot quantification

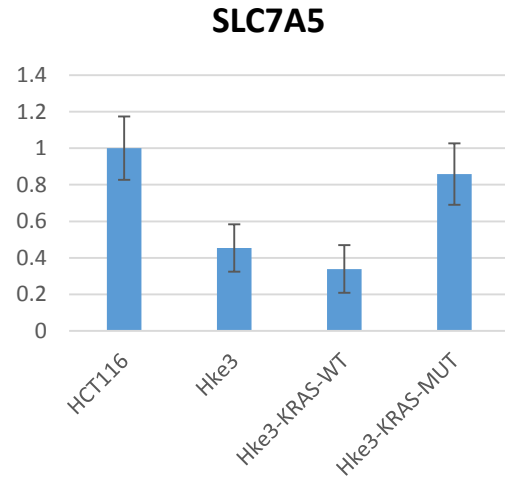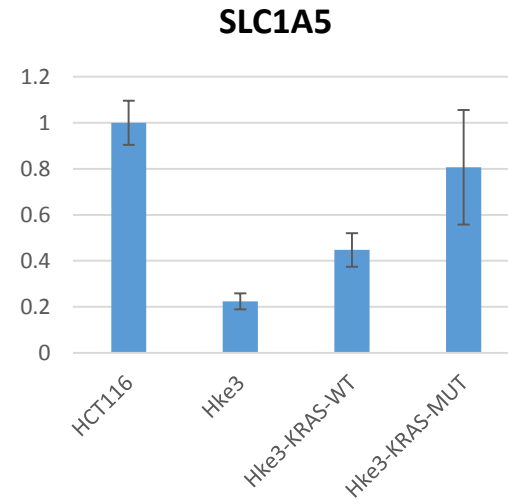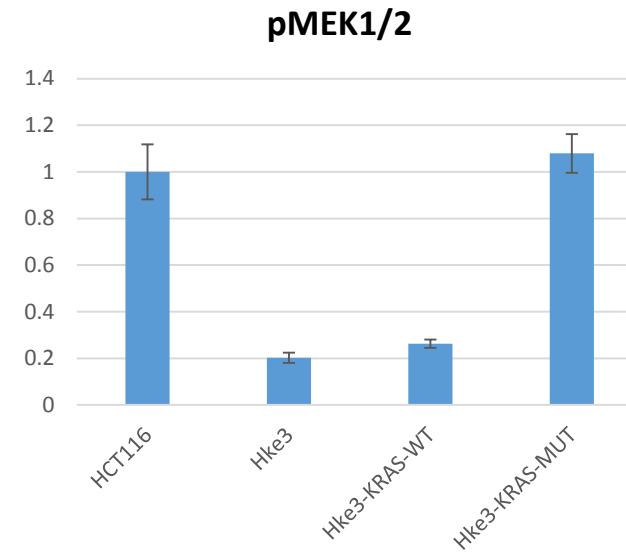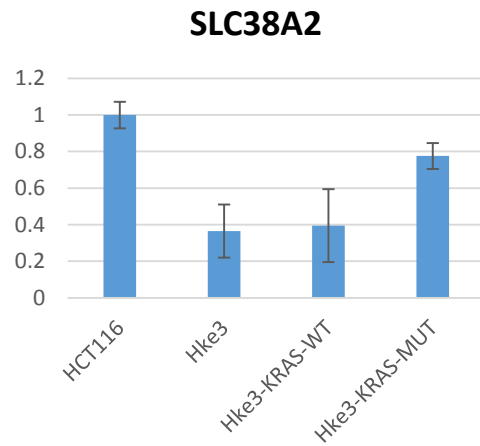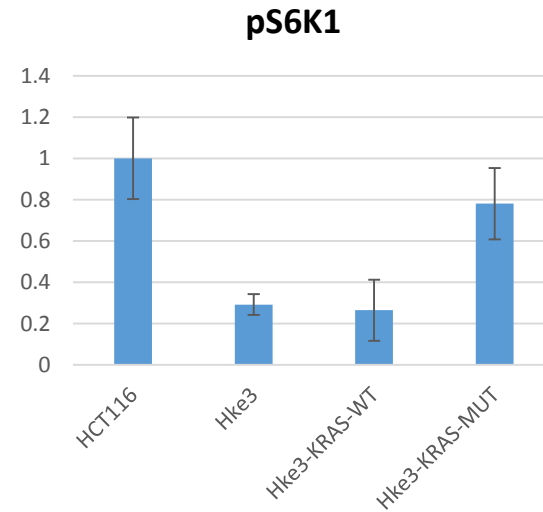

Figure 3A. Bar graph shows the relative protein expression levels of the targets (SLC7A5, SLC1A5, SLC38A2, pS6K1 and pMEK1/2) in HCT116 and Hke3 cells.

## Supplementary Figure S3A. Western blot quantification

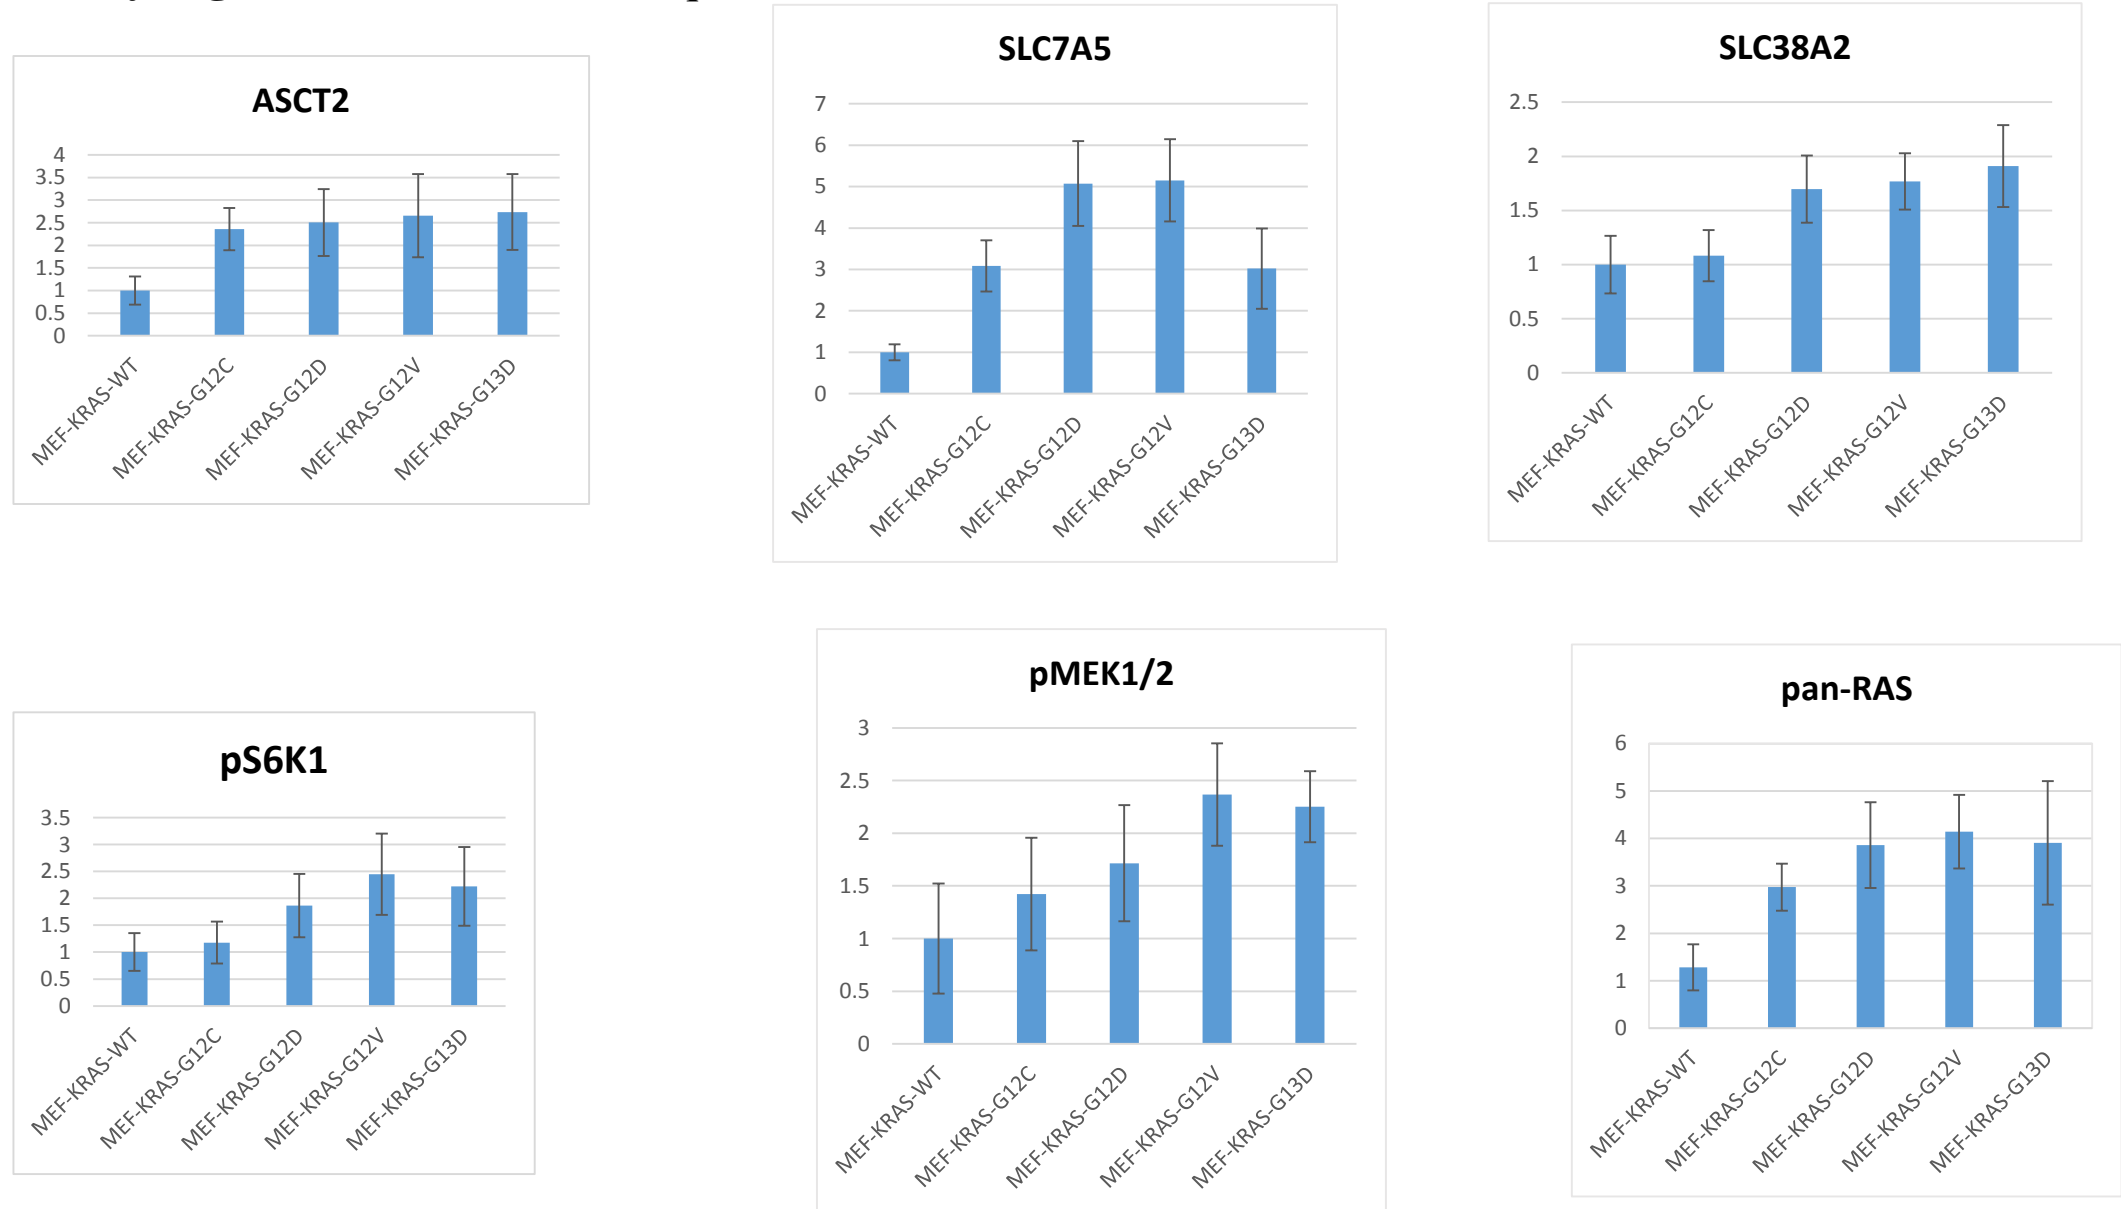

**Figure S3A.** Bar graph shows the relative protein expression levels of the targets (SLC7A5, SLC1A5, SLC38A2, pS6K1, pan-RAS and pMEK1/2) in MEF-KRAS cells.

**Figure 4D. Western blot quantification**

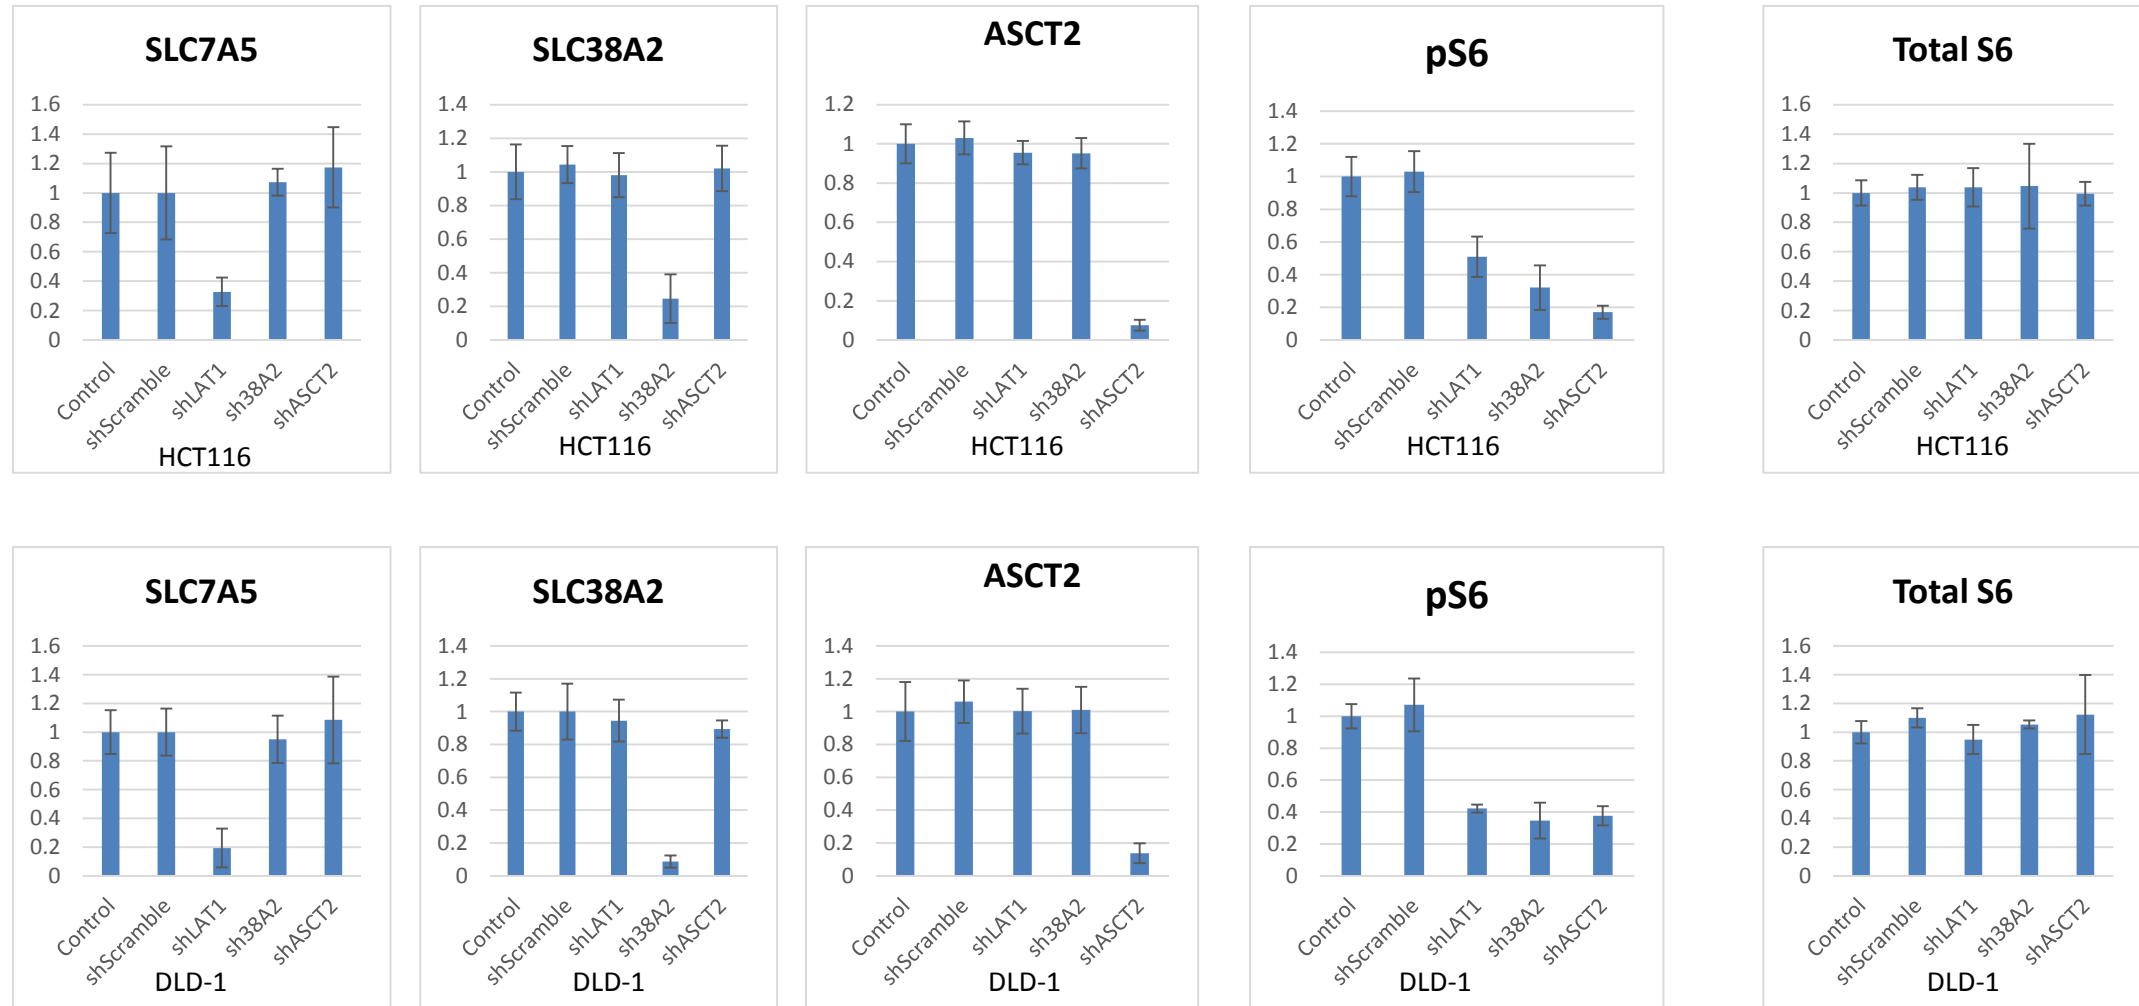

**Figure 4D.** Bar graph shows the relative protein expression levels of the targets (SLC7A5, SLC1A5, SLC38A2, pS6 and total S6) in HCT116 and DLD-1 cells following shRNA transfection against AATs.

**Figure 5C and D.** Western blot quantification

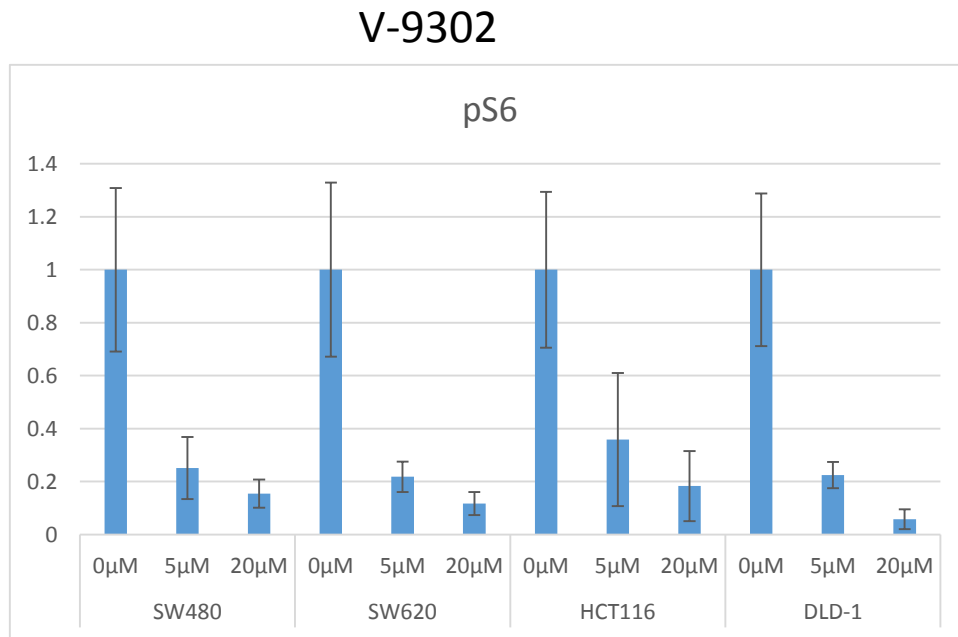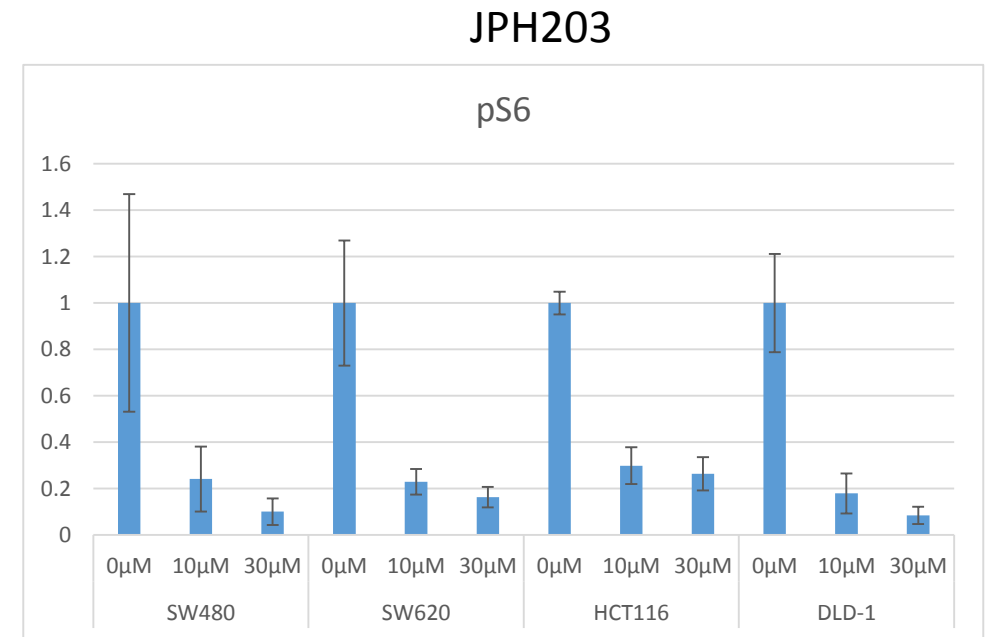

**Figure 5C and D.** Bar graph shows the relative protein expression levels of the pS6 in different CRC cells following the treatments with the inhibitors of AATs (JPH203 and V-9302).



## Supplementary Figure S5.C and D. Western blot quantification

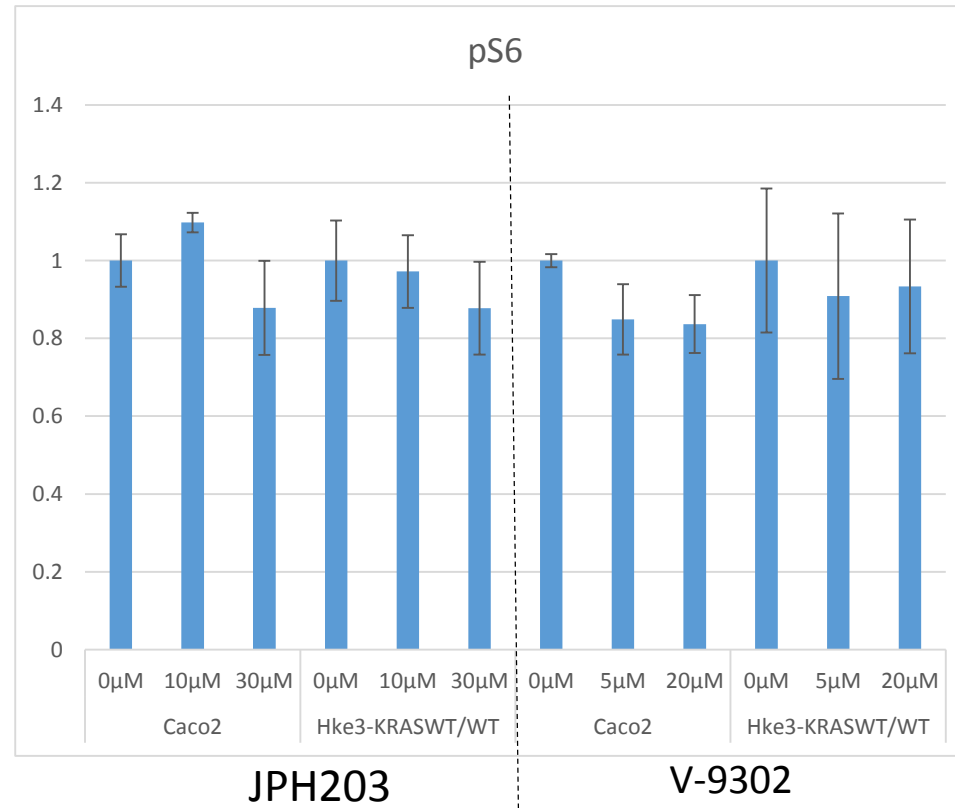

**Supplementary Figure 5C and D.** Bar graph shows the relative protein expression levels of the pS6 in CRC cells following the treatments with the inhibitors of AATs (JPH203 and V-9302).

**Figure 6F.** Western blot quantification

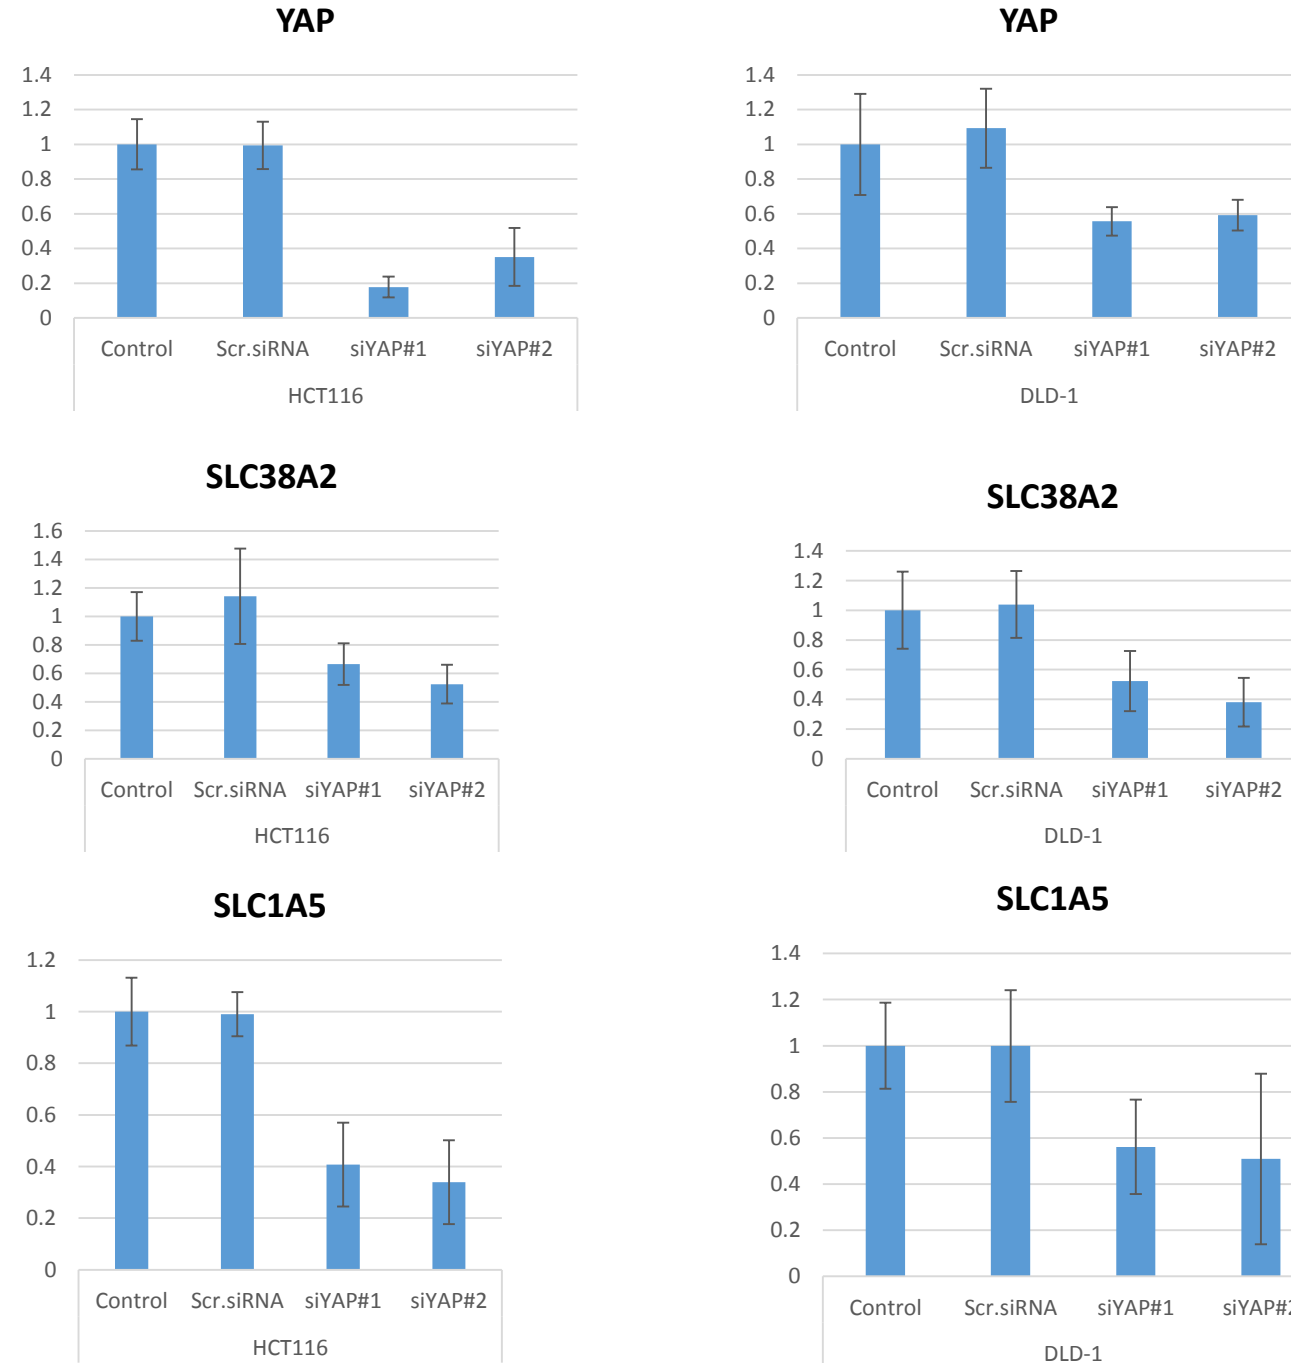

Figure 6. Bar graph shows the relative protein expression levels of the targets (YAP, SLC38A2, SLC1A5) in siYAP transfected cells.

**Figure 6F. Western blot quantification**

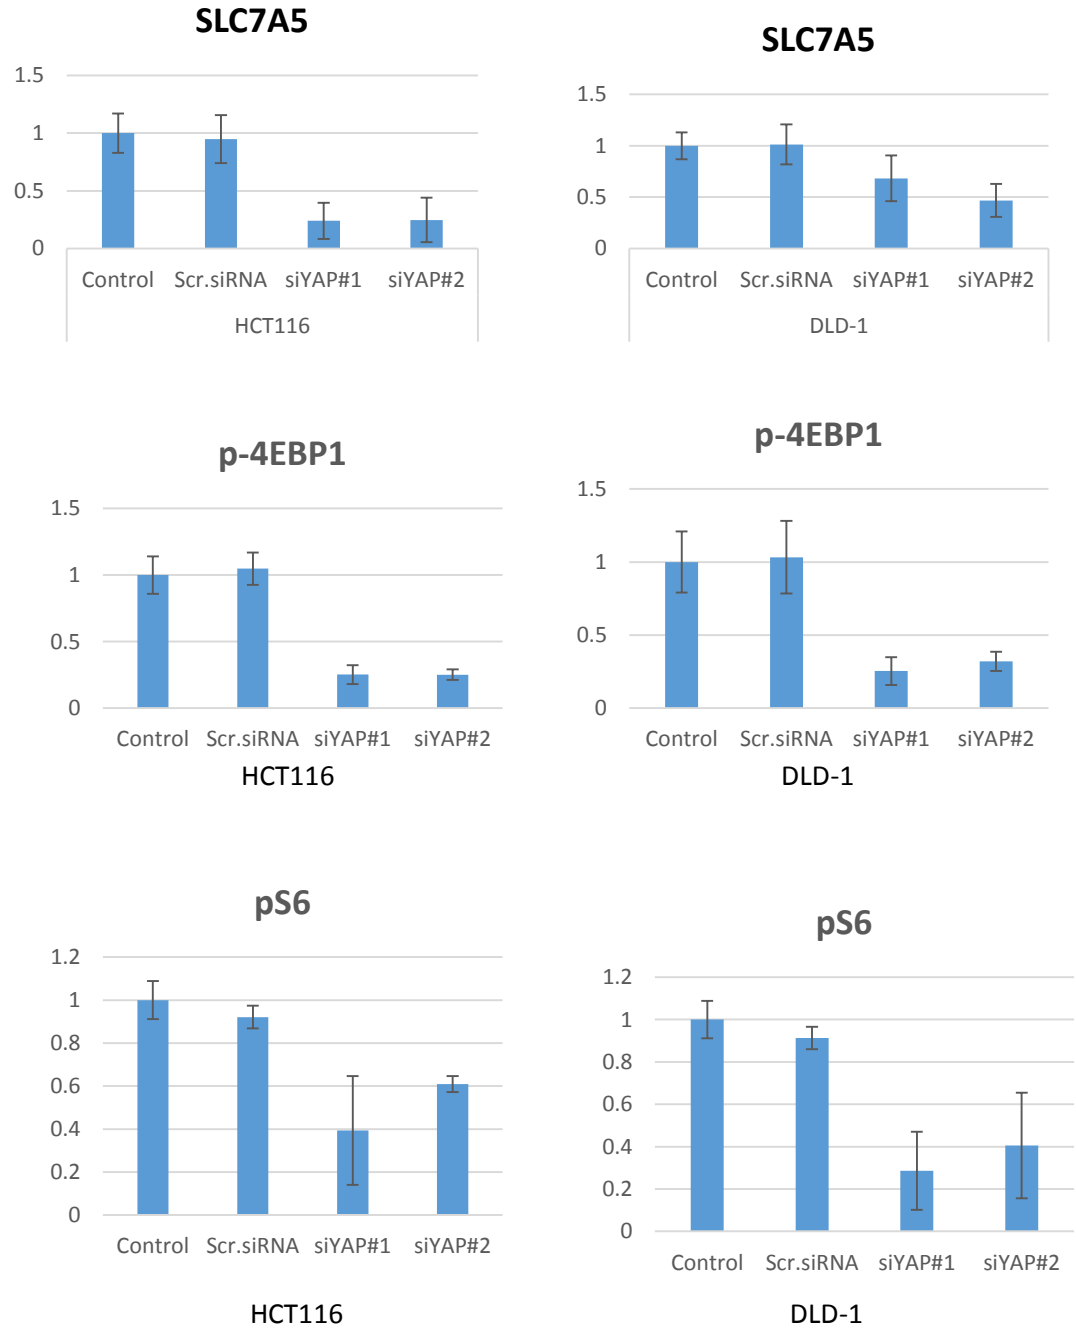

Figure 6. Bar graph shows the relative protein expression levels of the targets (SLC7A5, p-4EBP1, pS6) in siYAP transfected cells.

Figure 6. G. Western blot quantification

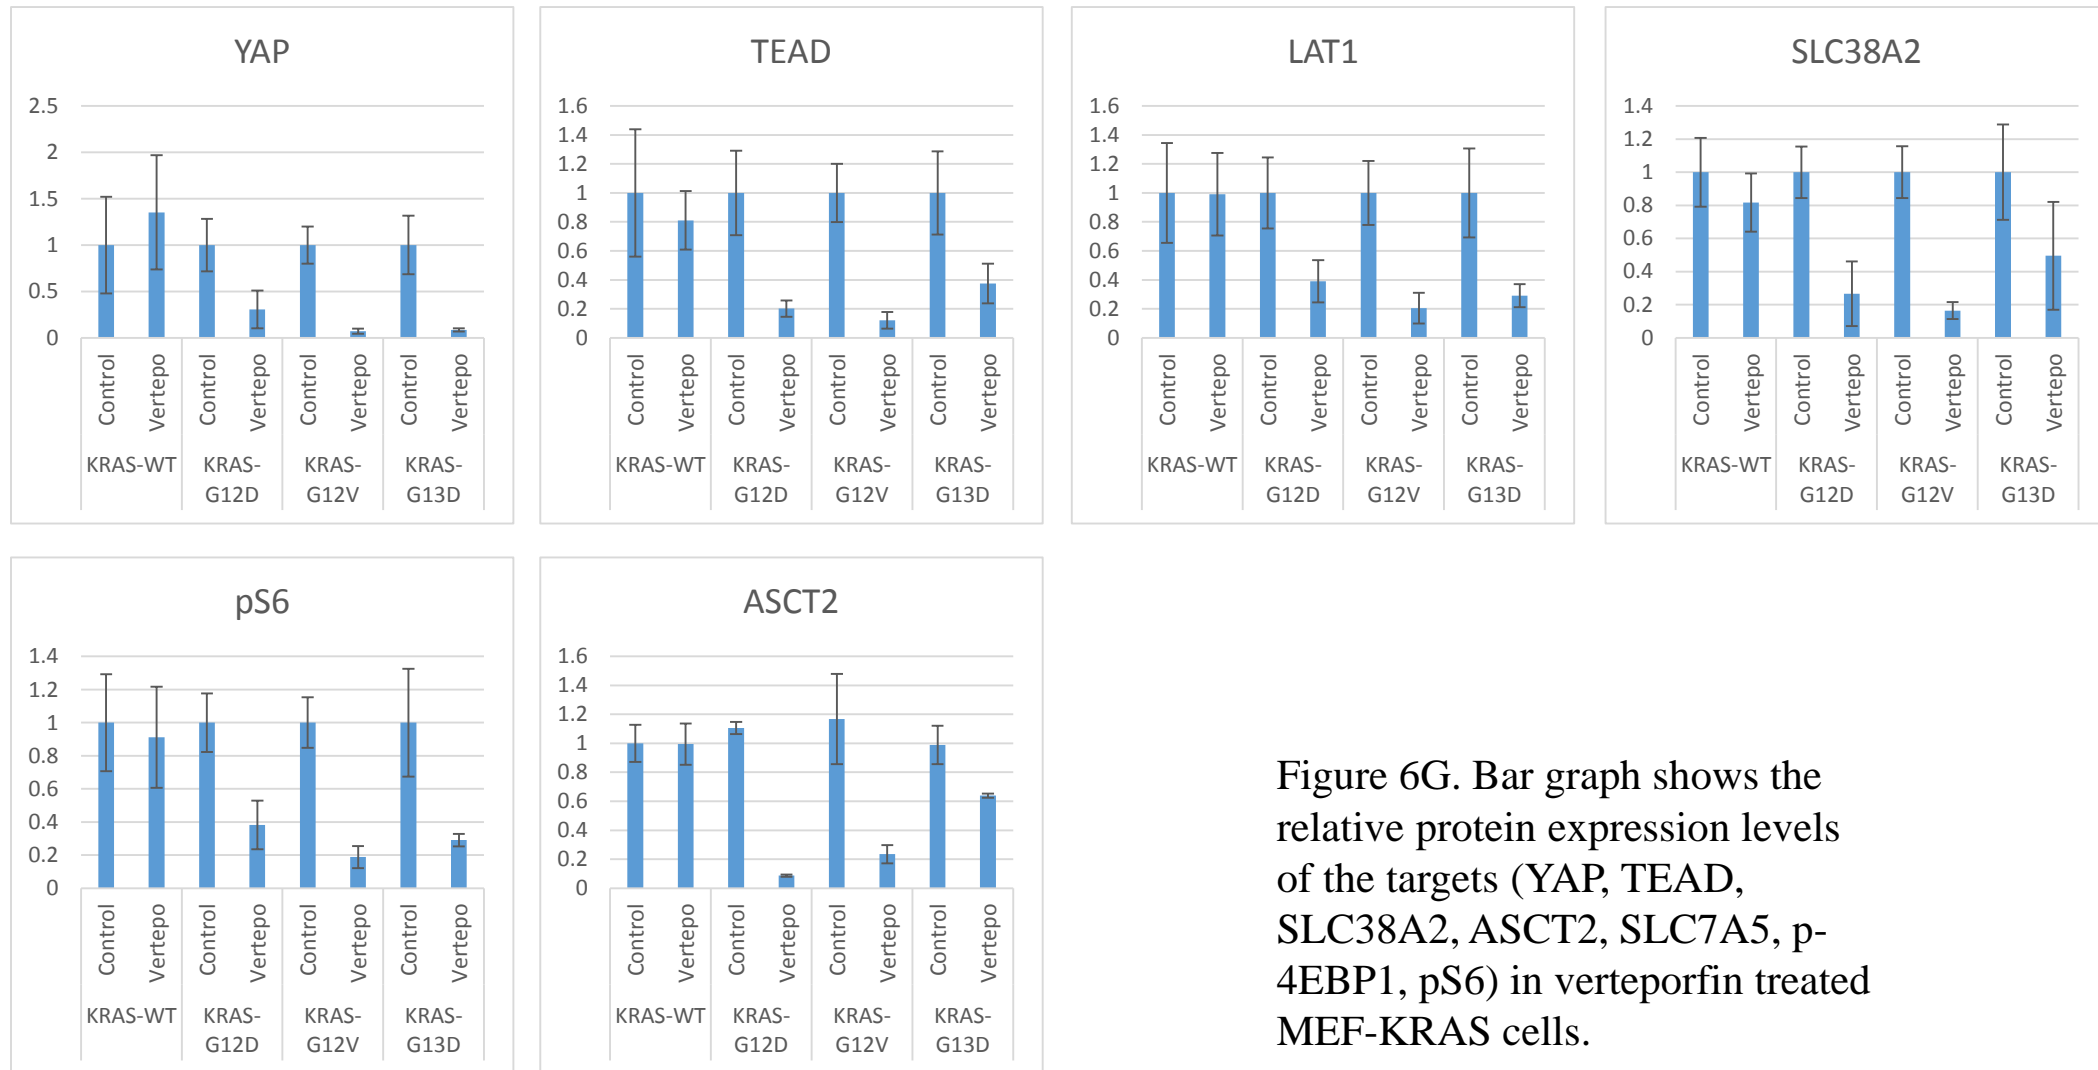

Figure 6G. Bar graph shows the relative protein expression levels of the targets (YAP, TEAD, SLC38A2, ASCT2, SLC7A5, p-4EBP1, pS6) in verteporfin treated MEF-KRAS cells.
