# Supplementary material for: Oncogenic KRAS mutations enhance amino acid uptake by colorectal cancer cells via the hippo signaling effector YAP1
Source: PubMed Central journal article supplement (PMC8486573; doi:10.1002/1878-0261.12999), 2021-06-18
Supplement: MOL2-15-2782-s008.pdf [file MOL2-15-2782-s008.pdf]

**Supplementary Table 1. shRNA primers used in this study**

|                |     |                                                                    |
|----------------|-----|--------------------------------------------------------------------|
| shKRAS-1       | FWD | GATCCCCGTTGGAGCTGATGGCGTAGTTCAAGAGACTACGCCATCAGCTCCAACTTTTGGAAA    |
|                | REV | AGCTTTTCCAAAAAGTTGGAGCTGATGGCGTAGTCTCTTGAACACTACGCCATCAGCTCCAACGGG |
| shKRAS-2       | FWD | GATCCCCGTTGGAGCTGTTGGCGTAGTTCAAGAGA CTACGCCAACAGCTCCAACTTTTGGAAA   |
|                | REV | AGCTTTTCCAAAAAGTTGGAGCTGTTGGCGTAGTCTCTTGAACACTACGCCAACAGCTCCAACGGG |
| shKRAS-3       | FWD | GATCCCCGTTGGAGCTGGTGACGTAGTTCAAGAGACTACGTCACCAGCTCCAACTTTTGGAAA    |
|                | REV | AGCTTTTCCAAAAAGTTGGAGCTGGTGACGTAGTCTCTTGAACACTACGTCACCAGCTCCAACGGG |
| shLAT1 #1      | FWD | GATCCCCGCGGCCGAGGAGAAGGAAGTTCAAGAGACTTCCTTCTCCTCGGCCGCTTTTTGGAAA   |
|                | REV | AGCTTTTCCAAAAAGCGGCCGAGGAGAAGGAAGTCTCTTGAACACTTCCTTCTCCTCGGCCGCGGG |
| shSLC38A2 #1   | FWD | GATCCCCGGACGATTCAGTATTTCCCTTCAAGAGAGGGAAATACTGAATCGTCTTTTTGGAAA    |
|                | REV | AGCTTTTCCAAAAAGGACGATTCAGTATTTCCCTCTCTTGAAGGGAAATACTGAATCGTCCGGG   |
| shASCT2 #1     | FWD | GATCCCCCTGGATTATGAGGAATGGATTCAAGAGATCCATTCTCATAATCCAGTTTTGGAAA     |
|                | REV | AGCTTTTCCAAAAACTGGATTATGAGGAATGGATCTCTTGAATCCATTCTCATAATCCAGGGG    |
| Scramble shRNA | FWD | GATCCCCGCGAAAGATGATAAGCTAATTCAGAGATTAGCTTATCATCTTTCGCTTTTTGGAAA    |
|                | REV | AGCTTTTCCAAAAAGCGAAAGATGATAAGCTAATCTCTTGAATTAGCTTATCATCTTTCGCGGG   |

**Supplementary Table 2. Real time qPCR primers**

SLC1A2 –FWD - GGTGATGTCAGCTCTCGACG  
SLC1A2 – REV – CAGGGAGGGATTGCAAGGTT

SLC1A3 –FWD - TCTTGTTTCTCTGGGGCATCT  
SLC1A3 – REV – TTGCTCAAACAAGCCAAAAC

SLC1A5 – FW - ACCAGGGTGAAGGTGCCCGT  
SLC1A5 – REV-CTTCAGGCCCCAGCTTCCGC

SLC1A6 – FWD - GAGGTCGGGAGAACCAAGTG  
SLC1A6 –REV – TCCTGCTCAGAAAATGTCCCT

SLC1A7 – FWD - TTGTGGCTTCCCTCTAAGGC  
SLC1A7 – REV – CAGGTGGTCGGAGTTGCTAA

SLC3A2 – FWD –ATGCTTGCTGGTGCCGTGGT  
SLC3A2 –REV - TTCAGACCCGCCAGGTTGCC

SLC7A1– FW –CTGGCAGCTCACGGAGGAGGA  
SLC7A1– REV -GCCCCCGACAGGACACCAGA

SLC7A2 – FW - CTCCTCTTCGCGGGACCA  
SLC7A2 – REV- AGACATCGGGCAAAGGTCAG

SLC7A5 – FW –GAGAAGGAAGAGGCGCGG  
SLC7A5 – REV -CCGAGCCGATAATGGTCCC

SLC7A6– FW –TGGCTGCTGCTTGCATATGTCTGC  
SLC7A6– REV –ATGAGCGCTACGACCTTGGCG

SLC7A7– FW –AGGCATTTGTCTGGCCTTCCCTTT  
SLC7A7– REV –TGGCATTGCCTCCTTGGTCCTG

SLC7A8– FW –TCCCCGCCCCATCAAGATCA  
SLC7A8– REV –GTGCAGCAGGAGTGGCTGGG

SLC7A9 – FW - GAGGAAGCCAGCTCCCCTA  
SLC7A9 – REV – CCATGTTTCCTCCTGCTGGT

SLC7A11 – FW - ATGGGACAAGAAACCCAGGTG  
SLC7A11 – REV – TCCCTATTTTGTGTCTCCCCTTG

SLC38A1 – FW -AGCGGCGGTGCATGTGGA  
SLC38A1 – REV –GGAAGCTTGACACCCCTGTTAGC

SLC38A2 – FW - AGCATGAAGAAGGCCGAAAT  
SLC38A2 – REV - TTCAGAGCAGCTTGCTTGG

SLC38A3 – FW – GCTGTTGCAGCCGAGTTC

SLC38A3 – REV – CACTGGTCTCACACCAACAGT

SLC38A4 – FW - CCCCACTCACACAGAACAGAG

SLC38A4 – REV – CAGCGCTTTCTTGTCCACAC

SLC38A6 – FW – CAAGTCGACTCGCTCCTCTC

SLC38A6 – REV - TCTACGAGCCTCTACCCCTG

SLC38A7 – FW- TAGATCCCCGAGGTCTGTGG

SLC38A7 – REV – CTGCAGGGAAAGGGTCTGAG

SLC38A8 – FW - CTGACGGGGGTTTATGGCTT

SLC38A8 – REV – GAGCACGATGGGGTAGACAG

SLC38A9 – FW - CCTGTTTGGACTAGGAGCCC

SLC38A9 – REV – CTCGGTGGACCTCAGTTTCC

SLC38A10 –FW- CTGTGAGAGCCAGCATCCAA

SLC38A10 –REV- TGGACACCAAACAGCATCCA

SLC6A14 –FW-ATCAGGACCGTGGTAACTGGTCCAA

SLC6A14 –REV-TCAAGAAGGCGCCTCCACCATTG

SLC6A15 –FW - AAGACACACTGACGGTGCAT

SLC6A15 –REV – TCGCCGAATTCTTTGACCCA

SLC6A18 – FW - GTCACGCTGTCCTTCCTGAT

SLC6A18 – REV – TGTTCTGTTGAGGTCCGGTG

SLC6A19 – FW - AACCTGGTCACAATCGTCCC

SLC6A19 – REV - TCTGCTGCTGTGGAGTCTTG

GAPDH- FW - GGATTTGGTGGTATTGGG

GAPDH- REV - GGAAGATGGTGATGGGATT

**Supplementary Table 3: GSEA result show differentially expressed pathways in Hke3-KRAS mutant cells.** GSEA summary table show Hke3-KRAS mutant cells upregulated KRAS signaling and several oncogenic pathways, including KRAS, AKT, MEK, MTOR and YAP pathways.

| NAME                                      | SIZE | ES       | NES      | NOM p-val | FDR q-val |
|-------------------------------------------|------|----------|----------|-----------|-----------|
| KRAS.50_UP.V1_DN                          | 47   | 0.727041 | 1.672825 | 0         | 0         |
| KRAS.LUNG.BREAST_UP.V1_DN                 | 141  | 0.590906 | 1.479416 | 0         | 0.029072  |
| LTE2_UP.V1_DN                             | 195  | 0.577013 | 1.461095 | 0         | 0.027539  |
| KRAS.300_UP.V1_DN                         | 140  | 0.56784  | 1.414121 | 0         | 0.054492  |
| RPS14_DN.V1_UP                            | 190  | 0.546408 | 1.385268 | 0         | 0.069131  |
| KRAS.LUNG_UP.V1_DN                        | 142  | 0.557824 | 1.379666 | 0.002     | 0.061997  |
| CSR_EARLY_UP.V1_DN                        | 126  | 0.554534 | 1.376344 | 0         | 0.055551  |
| LEF1_UP.V1_DN                             | 187  | 0.540231 | 1.360715 | 0         | 0.06644   |
| BCAT_GDS748_DN                            | 45   | 0.591219 | 1.360629 | 0.029106  | 0.059057  |
| PTEN_DN.V2_UP                             | 139  | 0.555514 | 1.360524 | 0.002008  | 0.053526  |
| KRAS.600.LUNG.BREAST_UP.V1_DN             | 284  | 0.531766 | 1.35987  | 0         | 0.049514  |
| MEK_UP.V1_DN                              | 193  | 0.537247 | 1.356174 | 0         | 0.049454  |
| KRAS.600_UP.V1_DN                         | 279  | 0.528362 | 1.35056  | 0         | 0.050982  |
| <b>YAP1_UP</b>                            | 47   | 0.576126 | 1.323469 | 0.03617   | 0.083288  |
| AKT_UP.V1_UP                              | 169  | 0.51491  | 1.312728 | 0.002     | 0.094015  |
| BCAT_BILD_ET_AL_UP                        | 45   | 0.561913 | 1.309766 | 0.048117  | 0.093536  |
| KRAS.PROSTATE_UP.V1_DN                    | 141  | 0.521345 | 1.308069 | 0.002012  | 0.090239  |
| DCA_UP.V1_DN                              | 184  | 0.520673 | 1.307438 | 0.002     | 0.08627   |
| <b>CORDENONSI_YAP_CONSERVED_SIGNATURE</b> | 57   | 0.553713 | 1.306511 | 0.0375    | 0.084002  |
| RB_DN.V1_UP                               | 117  | 0.515256 | 1.292628 | 0.022222  | 0.106851  |
| ESC_V6.5_UP_EARLY.V1_DN                   | 161  | 0.510946 | 1.284666 | 0.006036  | 0.117957  |
| PKCA_DN.V1_DN                             | 154  | 0.505047 | 1.274993 | 0.016064  | 0.134621  |
| KRAS.BREAST_UP.V1_DN                      | 143  | 0.51481  | 1.26997  | 0.008048  | 0.142399  |
| RAPA_EARLY_UP.V1_UP                       | 167  | 0.502631 | 1.264955 | 0.016     | 0.147812  |
| PRC2_SUZ12_UP.V1_UP                       | 184  | 0.499434 | 1.255737 | 0.004008  | 0.169384  |
| NOTCH_DN.V1_UP                            | 185  | 0.490813 | 1.24712  | 0.018     | 0.189612  |
| PDGF_UP.V1_DN                             | 132  | 0.497363 | 1.242207 | 0.030181  | 0.199217  |
| SNF5_DN.V1_UP                             | 173  | 0.494283 | 1.241386 | 0.018     | 0.195321  |
| EIF4E_DN                                  | 100  | 0.495009 | 1.229014 | 0.085366  | 0.234694  |
| AKT_UP_MTOR_DN.V1_UP                      | 178  | 0.483054 | 1.218779 | 0.024     | 0.267937  |
| ATM_DN.V1_UP                              | 146  | 0.484149 | 1.215959 | 0.04      | 0.271283  |
| CAHOY_ASTROGLIAL                          | 100  | 0.492037 | 1.20911  | 0.092929  | 0.2952    |
| IL2_UP.V1_DN                              | 192  | 0.47425  | 1.201629 | 0.044177  | 0.324817  |
| CYCLIN_D1_UP.V1_DN                        | 190  | 0.474798 | 1.195467 | 0.042     | 0.347847  |
| CAHOY_ASTROCYTIC                          | 100  | 0.487623 | 1.194946 | 0.120724  | 0.340649  |
| IL15_UP.V1_DN                             | 185  | 0.470222 | 1.187365 | 0.054     | 0.370684  |
| TBK1.DN.48HRS_UP                          | 50   | 0.512096 | 1.186988 | 0.174004  | 0.363303  |
| JAK2_DN.V1_DN                             | 144  | 0.475617 | 1.184571 | 0.068273  | 0.366844  |
| NRL_DN.V1_UP                              | 136  | 0.473472 | 1.18423  | 0.088     | 0.359507  |
| ALK_DN.V1_DN                              | 139  | 0.473899 | 1.183517 | 0.100402  | 0.354321  |
| IL21_UP.V1_DN                             | 186  | 0.467553 | 1.18291  | 0.066     | 0.348241  |
| CSR_LATE_UP.V1_DN                         | 147  | 0.470532 | 1.179778 | 0.090361  | 0.356131  |
| RAPA_EARLY_UP.V1_DN                       | 184  | 0.464849 | 1.174293 | 0.086     | 0.377339  |
| CRX_NRL_DN.V1_UP                          | 140  | 0.467575 | 1.173311 | 0.118952  | 0.373372  |
| PTEN_DN.V1_UP                             | 185  | 0.468173 | 1.171977 | 0.076     | 0.372629  |
| KRAS.DF.V1_DN                             | 192  | 0.458927 | 1.168303 | 0.07014   | 0.384446  |
| PRC1_BMI_UP.V1_DN                         | 187  | 0.462202 | 1.168163 | 0.068     | 0.376907  |
| MTOR_UP.N4.V1_DN                          | 183  | 0.464254 | 1.168026 | 0.078     | 0.369604  |
| VEGF_A_UP.V1_UP                           | 195  | 0.462448 | 1.166695 | 0.082164  | 0.368077  |

**Supplementary Table 4: GSEA result show downregulation of major Hallmark pathways in siYAP transfected HCT116 cells.** GSEA summary table show HCT116 cells upregulated mTORC1 signaling and several oncogenic pathways, including E2F, G2M, and MYC, while YAP siRNA transfected cells had a significant downregulation of genes in the E2F, G2M, MTORC1 and MYC pathways.

| NAME                                       | SIZE | ES       | NES      | NOM p-val | FDR q-val |
|--------------------------------------------|------|----------|----------|-----------|-----------|
| HALLMARK_E2F_TARGETS                       | 199  | -0.69647 | -3.06596 | 0         | 0         |
| HALLMARK_G2M_CHECKPOINT                    | 199  | -0.6802  | -3.0027  | 0         | 0         |
| HALLMARK_MITOTIC_SPINDLE                   | 198  | -0.54339 | -2.34664 | 0         | 0         |
| HALLMARK_INTERFERON_ALPHA_RESPONSE         | 96   | -0.55896 | -2.23639 | 0         | 0         |
| HALLMARK_DNA_REPAIR                        | 150  | -0.47329 | -2.00096 | 0         | 0         |
| HALLMARK_INTERFERON_GAMMA_RESPONSE         | 200  | -0.44235 | -1.92045 | 0         | 0         |
| HALLMARK_ESTROGEN_RESPONSE_LATE            | 199  | -0.43515 | -1.91705 | 0         | 0         |
| HALLMARK_UV_RESPONSE_UP                    | 158  | -0.44206 | -1.88693 | 0         | 1.45E-04  |
| HALLMARK_P53_PATHWAY                       | 199  | -0.41436 | -1.81642 | 0         | 5.15E-04  |
| HALLMARK_UNFOLDED_PROTEIN_RESPONSE         | 112  | -0.43743 | -1.7759  | 0.001368  | 8.48E-04  |
| HALLMARK_UV_RESPONSE_DN                    | 144  | -0.42068 | -1.77492 | 0         | 7.71E-04  |
| HALLMARK_MTORC1_SIGNALING                  | 199  | -0.40217 | -1.75352 | 0         | 8.86E-04  |
| HALLMARK_ESTROGEN_RESPONSE_EARLY           | 198  | -0.38413 | -1.68139 | 0         | 0.003781  |
| HALLMARK_CHOLESTEROL_HOMEOSTASIS           | 73   | -0.43555 | -1.65951 | 0         | 0.004252  |
| HALLMARK_APOPTOSIS                         | 161  | -0.38847 | -1.65605 | 0         | 0.003969  |
| HALLMARK_GLYCOLYSIS                        | 200  | -0.37827 | -1.65468 | 0         | 0.003721  |
| HALLMARK_EPITHELIAL_MESENCHYMAL_TRANSITION | 200  | -0.35431 | -1.54489 | 0         | 0.013719  |
| HALLMARK_ANDROGEN_RESPONSE                 | 100  | -0.3693  | -1.46835 | 0.015537  | 0.028393  |
| HALLMARK_TNFA_SIGNALING_VIA_NFKB           | 198  | -0.32999 | -1.45419 | 0.007692  | 0.03105   |
| HALLMARK_HYPOXIA                           | 200  | -0.32806 | -1.4411  | 0.002497  | 0.034345  |
| HALLMARK_MYC_TARGETS_V1                    | 200  | -0.3252  | -1.42694 | 0.006361  | 0.037397  |
| HALLMARK_SPERMATOGENESIS                   | 135  | -0.34267 | -1.42005 | 0.01626   | 0.038783  |
| HALLMARK_MYC_TARGETS_V2                    | 58   | -0.36894 | -1.36655 | 0.071207  | 0.063522  |
| HALLMARK_HEME_METABOLISM                   | 200  | -0.30494 | -1.33308 | 0.034527  | 0.084506  |
| HALLMARK_KRAS_SIGNALING_UP                 | 199  | -0.30061 | -1.31887 | 0.02799   | 0.091213  |
| HALLMARK_IL2_STAT5_SIGNALING               | 197  | -0.29384 | -1.29437 | 0.046572  | 0.108145  |

**Supplementary Table 5. GSEA result show downregulation of major oncogenic signalling pathways in siYAP transfected HCT116 cells.** GSEA summary table show HCT116 cells upregulated Cordenonsi\_YAP\_conserved\_signature, E2F, EGFR, mTORC1 signaling and several oncogenic pathways, including MEK and MYC, while YAP siRNA transfected cells had a significant downregulation of genes in the Cordenonsi YAP conserved signature, MEK, E2F, MTOR and MYC oncogenic pathways.

| NAME                               | SIZE | ES       | NES      | NOM p-val | FDR q-val | FWER p-val |
|------------------------------------|------|----------|----------|-----------|-----------|------------|
| CORDENONSI_YAP_CONSERVED_SIGNATURE | 57   | -0.70353 | -2.59526 | 0         | 0         | 0          |
| RPS14_DN.V1_DN                     | 186  | -0.55987 | -2.43561 | 0         | 0         | 0          |
| CSR_LATE_UP.V1_UP                  | 163  | -0.56055 | -2.41421 | 0         | 0         | 0          |
| RB_P107_DN.V1_UP                   | 129  | -0.57326 | -2.36787 | 0         | 0         | 0          |
| E2F1_UP.V1_UP                      | 188  | -0.52359 | -2.28718 | 0         | 0         | 0          |
| E2F3_UP.V1_UP                      | 185  | -0.50543 | -2.20597 | 0         | 0         | 0          |
| VEGF_A_UP.V1_DN                    | 193  | -0.49335 | -2.17613 | 0         | 0         | 0          |
| TBK1.DF_UP                         | 286  | -0.47382 | -2.17589 | 0         | 0         | 0          |
| PRC2_EZH2_UP.V1_DN                 | 191  | -0.49764 | -2.17092 | 0         | 0         | 0          |
| GCNP_SHH_UP_LATE.V1_UP             | 178  | -0.46995 | -2.02557 | 0         | 9.72E-05  | 0.001      |
| PRC2_EED_UP.V1_DN                  | 193  | -0.45341 | -1.96481 | 0         | 8.83E-05  | 0.001      |
| LTE2_UP.V1_DN                      | 195  | -0.44528 | -1.95101 | 0         | 8.10E-05  | 0.001      |
| SIRNA_EIF4GI_DN                    | 97   | -0.47526 | -1.89752 | 0         | 3.80E-04  | 0.005      |
| RAF_UP.V1_UP                       | 193  | -0.43187 | -1.88164 | 0         | 4.17E-04  | 0.006      |
| TBK1.DN.48HRS_DN                   | 49   | -0.52467 | -1.85378 | 0         | 5.14E-04  | 0.008      |
| EGFR_UP.V1_DN                      | 196  | -0.42149 | -1.83506 | 0         | 7.79E-04  | 0.013      |
| TBK1.DF_DN                         | 284  | -0.40633 | -1.8347  | 0         | 7.33E-04  | 0.013      |
| HOXA9_DN.V1_DN                     | 189  | -0.42084 | -1.82853 | 0         | 8.50E-04  | 0.016      |
| GCNP_SHH_UP_EARLY.V1_UP            | 168  | -0.42573 | -1.82342 | 0         | 8.05E-04  | 0.016      |
| ERBB2_UP.V1_DN                     | 197  | -0.39968 | -1.76638 | 0         | 0.001574  | 0.033      |
| P53_DN.V1_UP                       | 192  | -0.40365 | -1.74736 | 0         | 0.001869  | 0.041      |
| CAMP_UP.V1_UP                      | 195  | -0.40009 | -1.74202 | 0         | 0.001913  | 0.044      |
| EGFR_UP.V1_UP                      | 189  | -0.40217 | -1.73773 | 0         | 0.00196   | 0.047      |
| MEK_UP.V1_DN                       | 192  | -0.39162 | -1.71497 | 0         | 0.002561  | 0.064      |
| LTE2_UP.V1_UP                      | 187  | -0.3932  | -1.70345 | 0         | 0.00308   | 0.08       |
| PTEN_DN.V2_UP                      | 137  | -0.40842 | -1.70028 | 0         | 0.003032  | 0.08       |
| RB_DN.V1_UP                        | 117  | -0.40978 | -1.68945 | 0.001383  | 0.003358  | 0.091      |
| KRAS.DF.V1_UP                      | 190  | -0.39158 | -1.68098 | 0         | 0.003544  | 0.099      |
| AKT_UP.V1_UP                       | 167  | -0.3894  | -1.66847 | 0         | 0.00399   | 0.114      |
| SNF5_DN.V1_UP                      | 170  | -0.38692 | -1.66487 | 0         | 0.003955  | 0.117      |
| STK33_DN                           | 276  | -0.36071 | -1.65047 | 0         | 0.004616  | 0.139      |
| RAF_UP.V1_DN                       | 192  | -0.3743  | -1.64854 | 0         | 0.004502  | 0.139      |
| RB_P130_DN.V1_UP                   | 127  | -0.39573 | -1.64136 | 0         | 0.004689  | 0.15       |
| BMI1_DN.V1_UP                      | 145  | -0.39015 | -1.64036 | 0         | 0.004612  | 0.152      |
| MEK_UP.V1_UP                       | 195  | -0.36772 | -1.61756 | 0         | 0.005899  | 0.195      |
| EIF4E_DN                           | 100  | -0.39046 | -1.56786 | 0.001399  | 0.010991  | 0.335      |
| MTOR_UP.N4.V1_UP                   | 194  | -0.3589  | -1.5646  | 0         | 0.011169  | 0.35       |
| LEF1_UP.V1_UP                      | 191  | -0.3582  | -1.55002 | 0.001321  | 0.012911  | 0.407      |
| STK33_NOMO_DN                      | 276  | -0.34082 | -1.54662 | 0         | 0.013058  | 0.416      |
| MTOR_UP.V1_UP                      | 164  | -0.36071 | -1.53829 | 0.002663  | 0.014223  | 0.45       |
| CAHOY_OLIGODENDROCUTIC             | 96   | -0.38781 | -1.5323  | 0.01273   | 0.014851  | 0.472      |
| BCAT_GDS748_UP                     | 48   | -0.41912 | -1.48121 | 0.041411  | 0.026466  | 0.681      |
